# Supplementary material for: Polycaprolactone nanofibers as an adjuvant strategy for Tamoxifen release and their cytotoxicity on breast cancer cells
Source: PeerJ. 2021 Oct 27;9:e12124. doi: 10.7717/peerj.12124 (PMC8556714; doi:10.7717/peerj.12124)
Supplement: Supplemental Information 1 — Diameter nanofiber Figs. 1C–1D and release Figs. 5A–5C. These data were used for statistical analysis to compare time. [file peerj-09-12124-s001.xlsx]

## Sheet:  diameter nanofibers Fig 1c -1d
100	1	1	0.96154		150	6	6	6
300	24	25	24.0385		250	21	27	27
500	45	70	67.3077		350	20	47	47
700	16	86	82.6923		450	19	66	66
900	13	99	95.1923		550	13	79	79
1100	2	101	97.1154		650	12	91	91
1300	2	103	99.0385		750	4	95	95
1500	1	104	100		850	2	97	97
					950	0	97	97
					1050	0	97	97
					1150	1	98	98
					1250	2	100	100

## Sheet: release Fig 5a-b
time			porcent			PLC TMX				time								PLC TMX
0.1	0.23	0.23	6.17		0.28868	6.17				0.1	0.057	0.06	3.04		0.1	0.23	0.23	6.17
0.2	0.593	0.82	22.05		0.40825	22.05				0.2	0.147	0.2	10.85		0.2	0.593	0.82	22.05
0.3	0.252	1.07	28.79		0.5	28.79				0.3	0.069	0.27	14.53		0.3	0.252	1.07	28.79
0.3	0.18	1.25	33.63		0.57735	33.63				0.3	0.075	0.35	18.5		0.3	0.18	1.25	33.63
0.4	0.21	1.46	39.25		0.6455	39.25				0.4	0.118	0.47	24.79		0.4	0.21	1.46	39.25
1	0.353	1.82	48.72		1	48.72				1	0.207	0.67	35.82		1	0.353	1.82	48.72
2	0.255	2.07	55.55		1.41421	55.55				2	0.166	0.84	44.67		2	0.255	2.07	55.55
3	0.196	2.27	60.8		1.73205	60.8				3	0.162	1	53.3		3	0.196	2.27	60.8
5	0.275	2.54	68.16		2.23607	68.16				5	0.22	1.22	64.99		5	0.275	2.54	68.16
7	0.103	2.65	70.92		2.64575	70.92				7	0.026	1.25	66.39		7	0.103	2.65	70.92
9	0.281	2.93	78.44		3	78.44				9	0.166	1.41	75.21		9	0.281	2.93	78.44
11	0.206	3.13	83.96		3.31662	83.96				11	0.135	1.55	82.4		11	0.206	3.13	83.96
13	0.285	3.42	91.6		3.60555	91.6				13	0.149	1.7	90.3		13	0.285	3.42	91.6
14	0.314	3.73	100		3.74166	100				14	0.182	1.88	100		14	0.314	3.73	100
