# Supplementary material for: Polycaprolactone nanofibers as an adjuvant strategy for Tamoxifen release and their cytotoxicity on breast cancer cells
Source: PeerJ. 2021 Oct 27;9:e12124. doi: 10.7717/peerj.12124 (PMC8556714; doi:10.7717/peerj.12124)
Supplement: Supplemental Information 2 [file peerj-09-12124-s002.xlsx]

## Sheet: Hoja1
	Statistical analysis (ANOVA, BONFERRONI) of percentage viability values for MCF-7 Cells						Statistical analysis of viability porcentage MCF-7 STUDENT'S t Test
	Nanofiber incubation time (Days)	Resazurin Time (hours)	ANOVA	BONFERRONI			Nanofiber incubation time (Days)	Resazurin Time (hours)	STUDENT'S t Test
			PCL-P vs PCL-TMX vs MCF-7 no nanofiber	PCL-P vs MCF-7 no nanofiber	PLC-TMX vs MCF-7 no nanofiber				PCL-P vs MCF-7 no nanofiber	PLC-TMX vs MCF-7 no nanofiber	PCL-P vsPLC-TMX
	D1	4h	0.0003	9.066857 46.28315	-97.75815 -60.54185		D1	4h	0.015984	0.049207	0.040606
		6h	0.0003	12.81992 50.70009	-98.35008 -60.46992			6h	0.087442	0.013627	0.034835
		24h	0.0004	-9.498662 23.52866	-92.68866 -59.66134			24h	0.1914	0.025017	0.039513
	D2	4h	0.0005	-9.680766 36.22077	-121.1758 -75.27423		D2	4h	0.39268	0.036482	0.02156
		6h	0	3.013956 24.22604	-108.326 -87.11396			6h	0.066134	0.017455	0.0071901
		24h	0	-3.858012 3.368014	-102.363 -95.13699			24h	0.88186	0.0001934	0.0082396
	D3	4h	0	-7.311875 0.461869	-102.6019 -94.82813		D3	4h	0.26045	0.0025474	0.0072551
		6h	0.0002	-26.25456 6.504562	-116.2496 -83.49044			6h	0.34262	0.0080314	0.032774
		24h	0	-23.09293 -15.35707	-103.7479 -96.01207			24h	0.042489	0.00031869	0.0097472
	D4	4h	0.0007	-43.65636 1.746354	-122.0414 -76.63864		D4	4h	0.22002	0.0073054	0.051921
		6h	0.003	-59.2559 13.9059	-135.6659 -62.5041			6h	0.37099	0.039303	0.073162
		24h	0	-5.320794 6.710794	-106.6008 -94.56921			24h	0.44478	0.0056368	0.0092714
	D5	4h	0	-31.35058 -19.80942	-104.6506 -93.10942		D5	4h	0.059062	0.0072106	0.010948
		6h	0.0001	-23.80351 -1.106482	-110.7185 -88.02148			6h	0.017119	0.017421	0.017458
		24h	0	-4.41961 7.709611	-105.7896 -93.66039			24h	0.62176	0.0052026	0.010173
	D6	4h	0.0003	-22.89205 12.56205	-115.9071 -80.45295		D6	4h	0.60983	0.02521	0.02363
		6h	0	-7.689525 -0.120480	-102.7845 -95.21548			6h	0.23134	0.0075876	0.0020446
		24h	0	29.71824 39.41176	-102.4418 -92.74824			24h	0.031745	0.011447	0.00014451
	statistically significant in bold
	Statistical Analysis (ANOVA, BONFERRONI) of percentage viability values for PBMCs
	Nanofiber incubation time (Days)	Resazurin Time (hours)	ANOVA	BONFERRONI
			PCL-P vs PCL-TMX vs PBMCs no nanofiber	PCL-P vs PBMCs no nanofiber	PLC-TMX vs PBMCs no nanofiber
	D1	4h	0.0126	8.509006 ; 303.5789	-245.3371 ; 49.73275
		6h	0.0089	-.9241847 ; 204.1851	-202.0111 ; 3.098103
		24h	0.002	99.16688 ; 277.4065	-187.8961 ; -9.656393
		30h	0.0032	85.21517 ; 295.7372	-203.7958 ; 6.726217
		48h	0.0039	89.54594 ; 333.5833	-222.0187 ; 22.01869
	statistically significant in bold
	Percentage of viability of MCF7
	NN=No nanofiber
	Nanofiber incubation time (days) D1-D6
	Resazurin time (hours)	Nanofiber type	% Viability D1	% Viability D2	% Viability D3	% Viability D4	% Viability D5	% Viability D6
	4h	PCL-P	125.891	109.259	97.6255	85.6287	73.1068	98.5085
	4h	PCL-P	129.457	117.284	95.5236	72.4551	75.7282	91.1604
	4h	PCL-TMX	25.8915	1.54321	1.24562	0.838323	1.06796	2.0371
	4h	PCL-TMX	15.814	2.00617	1.32347	0.479042	1.16505	1.60058
	4h	NN	98.9147	105.401	99.5718	99.0419	101.068	96.3259
	4h	NN	101.085	94.5988	100.428	100.958	98.932	103.674
	6H	PCL-P	130.195	114.986	94.7634	86.099	85.3679	96.6687
	6H	PCL-P	133.333	112.251	85.489	68.5491	89.7157	95.5179
	6H	PCL-TMX	25.1099	2.39316	0.126183	0.86881	0.83612	1.27196
	6H	PCL-TMX	16.0703	2.16524	0.126183	0.955691	0.41806	0.726832
	6H	NN	102.825	102.792	98.7382	93.8315	97.4916	99.0915
	6H	NN	97.1751	97.208	101.262	106.169	102.508	100.909
	24H	PCL-P	106.394	98.9641	81.8909	102.199	103.171	135.11
	24H	PCL-P	107.642	100.554	79.6606	99.1929	100.122	134.021
	24H	PCL-TMX	28.3716	1.73452	0	-0.556638	0.182927	2.9808
	24H	PCL-TMX	19.2807	0.770899	0.242424	-0.612302	0.365854	1.83434
	24H	NN	101.548	100.506	99.8303	100.918	99.0854	98.8249
	24H	NN	98.4515	99.4941	100.17	99.0815	100.915	101.175
	Percentage of viability of PBMCs
	NN=No nanofiber
	Resazurin time (hours)	Nanofiber type	% Viability
	4h	PCL-P	298.901
	4h	PCL-P	213.187
	4h	PCL-TMX	0
	4h	PCL-TMX	4.3956
	4h	NN	105.495
	4h	NN	94.5055
	6H	PCL-P	171.739
	6H	PCL-P	231.522
	6H	PCL-TMX	1.08696
	6H	PCL-TMX	0
	6H	NN	96.7391
	6H	NN	103.261
	24H	PCL-P	265.385
	24H	PCL-P	311.189
	24H	PCL-TMX	1.3986
	24H	PCL-TMX	1.04895
	24H	NN	112.587
	24H	NN	87.4126
	30H	PCL-P	262.271
	30H	PCL-P	318.681
	30H	PCL-TMX	2.9304
	30H	PCL-TMX	0
	30H	NN	112.454
	30H	NN	87.5458
	48H	PCL-P	278.095
	48H	PCL-P	345.034
	48H	PCL-TMX	0
	48H	PCL-TMX	0
	48H	NN	112.653
	48H	NN	87.3469
